# Supplementary material for: Tailored e-Health services for the dementia care setting: a pilot study of ‘eHealthMonitor’
Source: PubMed Central journal article supplement (PMC4517387; doi:10.1186/s12911-015-0182-2), 2015-07-28
Supplement: 12911_2015_182_MOESM3_ESM.pdf [file 12911_2015_182_MOESM3_ESM.pdf]

| Theme                                                       | User  | Quotes from participants (Relevant examples)                                                                                                                                                                    |
|-------------------------------------------------------------|-------|-----------------------------------------------------------------------------------------------------------------------------------------------------------------------------------------------------------------|
| <b>Perceived benefits</b>                                   |       |                                                                                                                                                                                                                 |
| Aquisition of individualized information                    | C     | -                                                                                                                                                                                                               |
| Empowerment                                                 | C     | “Direct access to information.”                                                                                                                                                                                 |
| Overview of the course of the disease                       | C     | “It enables me to see how and when changes occur in the course of the disease.”                                                                                                                                 |
| Local support contacts                                      | C     | “The portal enables a direct access to local support services.”                                                                                                                                                 |
| Financial support                                           | C     | -                                                                                                                                                                                                               |
| Access to support from home                                 | C     | -                                                                                                                                                                                                               |
| Saving a great deal of time                                 | C     | -                                                                                                                                                                                                               |
| Improved interaction with MPs                               | C, MP | „Very good communication between all stakeholders of the dementia care process (e.g. physicians, professional caregivers, informal caregivers, ...).”                                                           |
| History data of the patient (course of disease, medication) | MP    | “...especially for elderly patients an overview of history data is very important.”                                                                                                                             |
| Improved use of services                                    | MP    | “Improved overview about local support services for informal caregivers.”                                                                                                                                       |
| Improved interaction between MPs                            | MP    | -                                                                                                                                                                                                               |
| Improved quality of life for caregivers and PwD             | MP    | -                                                                                                                                                                                                               |
| Improved access to information                              | MP    | -                                                                                                                                                                                                               |
| Improved compliance                                         | MP    | -                                                                                                                                                                                                               |
| Improved preparation for follow-up visit                    | MP    | -                                                                                                                                                                                                               |
| <b>Major concerns</b>                                       |       |                                                                                                                                                                                                                 |
| Time for regular portal use                                 | C     | “It is possible, that the usage of the portal will allot a high amount of time. However this is time, the person with dementia itself would benefit, if I spent that time with him instead of with the portal.” |
| Lack of personal contact to MPs                             | C     | “Portal may replace a personal visit to a physician or a professional caregiver.”                                                                                                                               |
| Data security                                               | C, MP | „I have concerns, that the person with dementia feels permanently monitored.”<br>“The data I am entering is very personal data.”                                                                                |
| Regular portal use by caregivers                            | MP    | “Interaction depends on regular portal entries from the informal caregiver. The physician needs an alert that interaction is working.”                                                                          |
| Increased administrative effort                             | MP    | “There is an increased administrative effort is the system is not integrated into existing IT infrastructures of the clinic.”                                                                                   |
| <b>Recommendations for further improvement</b>              |       |                                                                                                                                                                                                                 |
| Active-search functionality based on pre-defined terms      | C     | -                                                                                                                                                                                                               |
| Chatroom for caregivers                                     | C     | -                                                                                                                                                                                                               |
| Hard-copies (e.g. of diaries)                               | C     | -                                                                                                                                                                                                               |
| Quantitative summary of diary entries                       | C     | “Would be good to have an overview about the diaries for the informal caregiver as well.”                                                                                                                       |
| Emergency hotline                                           | C     | -                                                                                                                                                                                                               |
| Technical support                                           | C     | -                                                                                                                                                                                                               |
| Improved design                                             | C, MP | “I would prefer a bigger font and careful color selection especially for elderly people.”                                                                                                                       |
| Upload function for documents                               | MP    | „It would be good to include medical records, blood parameter, etc. – so that all MPs are aware of the current medical status and examinations.”                                                                |
| Medical history parameters                                  | MP    | -                                                                                                                                                                                                               |
| Improved interaction functionality                          | MP    | “The portal would benefit from an information exchange between all involved medical stakeholders.”                                                                                                              |
| Priority levels                                             | MP    | -                                                                                                                                                                                                               |
| Additional information                                      | MP    | „                                                                                                                                                                                                               |
